# Supplementary material for: A systematic mechanistic survey on the reactions between OH radical and CH3OH on ice
Source: Royal Society of Chemistry journal article supplement (doi:10.1039/d3fd00033h), 2023-01-01
Supplement: d3fd00033h2.pdf [file d3fd00033h2.pdf]

# SUPPORTING INFORMATION

## A systematic mechanistic survey on the reactions between OH radical and CH<sub>3</sub>OH on ice

W. M. C. Sameera,<sup>\*a,b</sup> Avon P. Jayaweera,<sup>b</sup> Atsuki Ishibashi,<sup>a</sup> Hiroshi Hidaka<sup>a</sup> and  
Yasuhiro Oba, Naoki Watanabe<sup>a</sup>

<sup>a</sup>Institute of Low Temperature Science, Hokkaido University, Sapporo, Hokkaido 060-0819,  
Japan.

<sup>b</sup>Department of Chemistry, University of Colombo, Colombo 00300, Sri Lanka.

E-mail: [wmcsameera@lowtem.hokudai.ac.jp](mailto:wmcsameera@lowtem.hokudai.ac.jp)

|                                                                                                                                      |   |
|--------------------------------------------------------------------------------------------------------------------------------------|---|
| <b>Table S1</b> Computed binding energies (eV). .....                                                                                | 3 |
| <b>Table S2</b> Computed binding energies from $\omega$ B97X-D/Def2-TZVP and ONIOM( $\omega$ B97X-D/Def2-TZVP:AMOEBA09) methods..... | 3 |
| <b>Figure S1</b> Optimized structures of CH <sub>2</sub> OH radical on ice.....                                                      | 4 |
| <b>Figure S2</b> Optimized structures of CH <sub>3</sub> OH molecule on ice.....                                                     | 5 |
| <b>Figure S3</b> Optimized transition state structures of CH <sub>3</sub> OH + OH → CH <sub>2</sub> OH + H <sub>2</sub> O. ....      | 6 |
| <b>Figure S4</b> Optimized transition state structures of CH <sub>3</sub> OH + OH → CH <sub>3</sub> O + H <sub>2</sub> O. ....       | 7 |
| <b>Table S3</b> Computed energies of the optimized structures.....                                                                   | 7 |
| <b>Table S4.</b> Computed energies of LMs and TSs of the reaction paths.....                                                         | 9 |

**Table S1** Computed binding energies (eV).

|   | CH <sub>2</sub> OH | CH <sub>3</sub> OH |
|---|--------------------|--------------------|
| A | 0.64               | 0.36               |
| B | 0.58               | 0.37               |
| C | 0.53               | 0.47               |
| D | 0.34               | 0.72               |
| E | 0.69               | 0.30               |
| F | 0.29               | 0.35               |
| G | 0.69               | 0.52               |
| H | 0.58               | 0.15               |
| I | 0.37               | 0.42               |
| J | 0.38               | 0.28               |
| K | 0.58               | 0.38               |
| L | 0.59               | 0.6                |
| M | 0.59               | 0.62               |
| N | 0.29               | 0.32               |
| O | 0.35               | 0.17               |
| P | 0.37               | 0.38               |

**Table S2.** Computed binding energies (eV, without ZPE) from  $\omega$ B97X-D/Def2-TZVP and ONIOM( $\omega$ B97X-D/Def2-TZVP:AMOEBA09) methods. Binding energies are shown in ascending order.

| CH <sub>2</sub> OH binding energy |      |               |             | CH <sub>3</sub> OH binding energy |      |               |             |
|-----------------------------------|------|---------------|-------------|-----------------------------------|------|---------------|-------------|
|                                   | QM   | ONIOM (QM:MM) | Discrepancy |                                   | QM   | ONIOM (QM:MM) | Discrepancy |
| N                                 | 0.30 | 0.25          | 0.05        | H                                 | 0.16 | 0.18          | -0.02       |
| J                                 | 0.35 | 0.37          | -0.02       | J                                 | 0.30 | 0.34          | -0.04       |
| D                                 | 0.36 | 0.38          | -0.02       | N                                 | 0.31 | 0.37          | -0.06       |
| F                                 | 0.38 | 0.41          | -0.03       | E                                 | 0.32 | 0.38          | -0.06       |
| O                                 | 0.46 | 0.42          | 0.04        | B                                 | 0.43 | 0.43          | 0.00        |
| I                                 | 0.47 | 0.46          | 0.01        | A                                 | 0.44 | 0.44          | 0.00        |
| M                                 | 0.47 | 0.46          | 0.01        | F                                 | 0.46 | 0.44          | 0.02        |
| P                                 | 0.49 | 0.47          | 0.02        | O                                 | 0.50 | 0.46          | 0.04        |
| C                                 | 0.61 | 0.61          | 0.00        | K                                 | 0.51 | 0.48          | 0.03        |
| B                                 | 0.64 | 0.66          | -0.02       | P                                 | 0.51 | 0.48          | 0.03        |

|   |      |      |       |   |      |      |       |
|---|------|------|-------|---|------|------|-------|
| K | 0.65 | 0.67 | -0.02 | I | 0.52 | 0.52 | 0.00  |
| L | 0.65 | 0.69 | -0.04 | M | 0.58 | 0.59 | -0.01 |
| H | 0.67 | 0.70 | -0.03 | C | 0.64 | 0.61 | 0.03  |
| A | 0.84 | 0.77 | 0.07  | G | 0.67 | 0.66 | 0.01  |
| G | 0.85 | 0.80 | 0.05  | L | 0.70 | 0.69 | 0.01  |
| E | 0.87 | 0.81 | 0.06  | D | 0.87 | 0.89 | -0.02 |

---

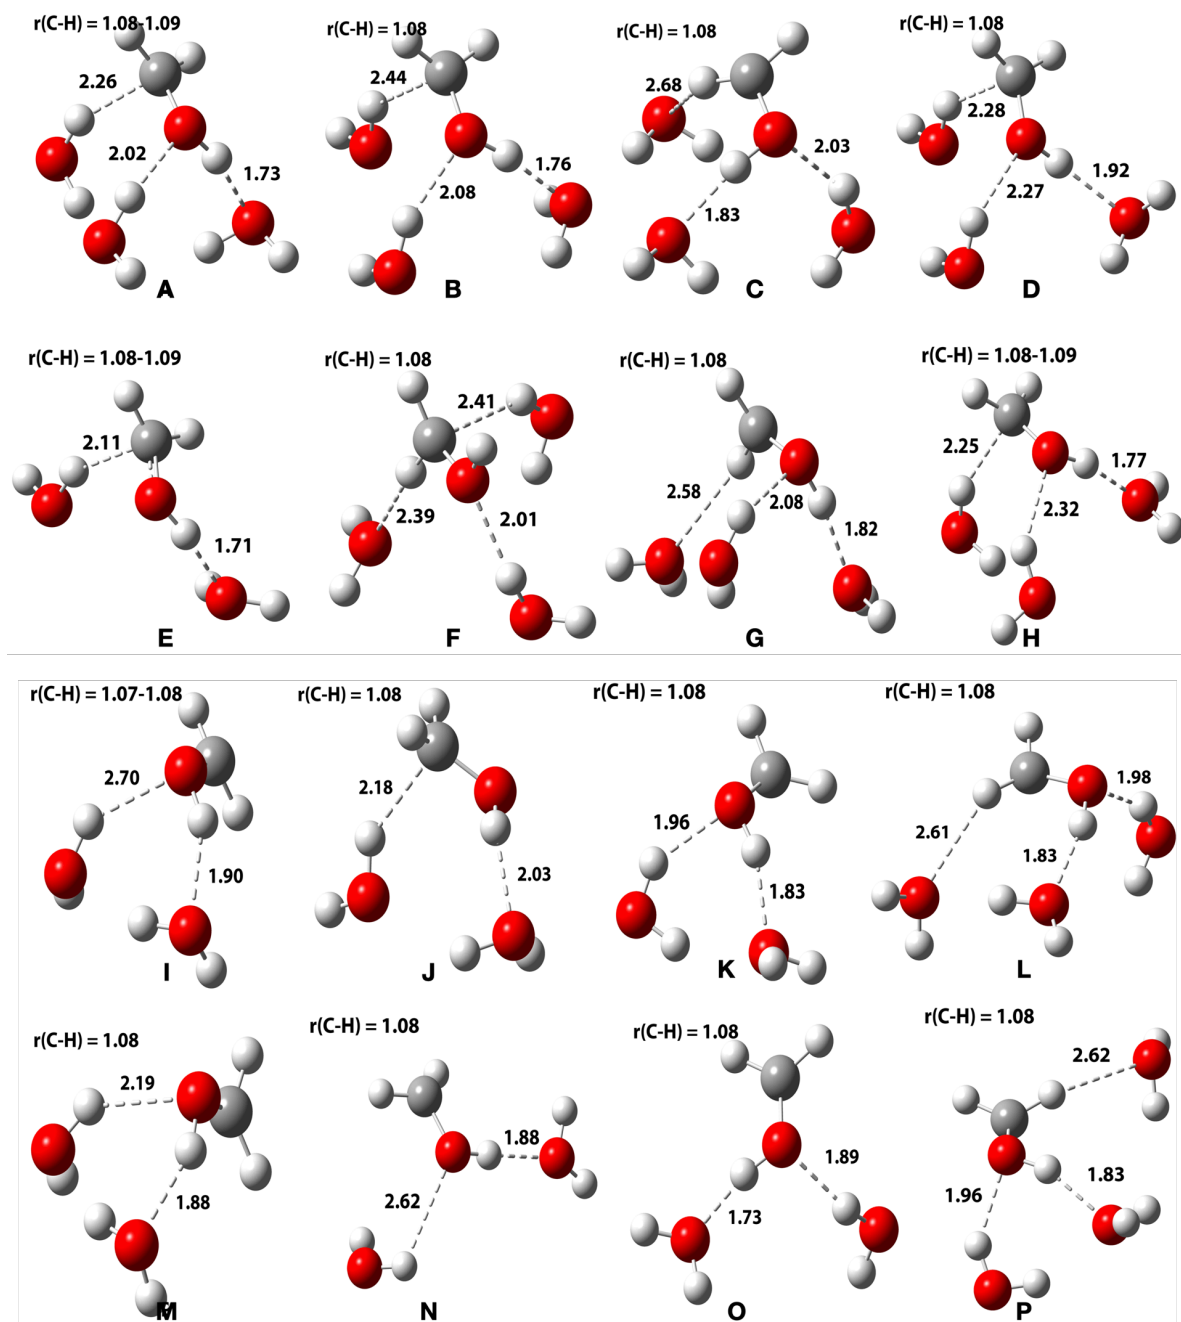

**Figure S1.** Optimized structures of  $\text{CH}_2\text{OH}$  radical on ice. For simplicity, only the  $\text{CH}_2\text{OH}$  radical and a few water molecules in the binding site are shown.

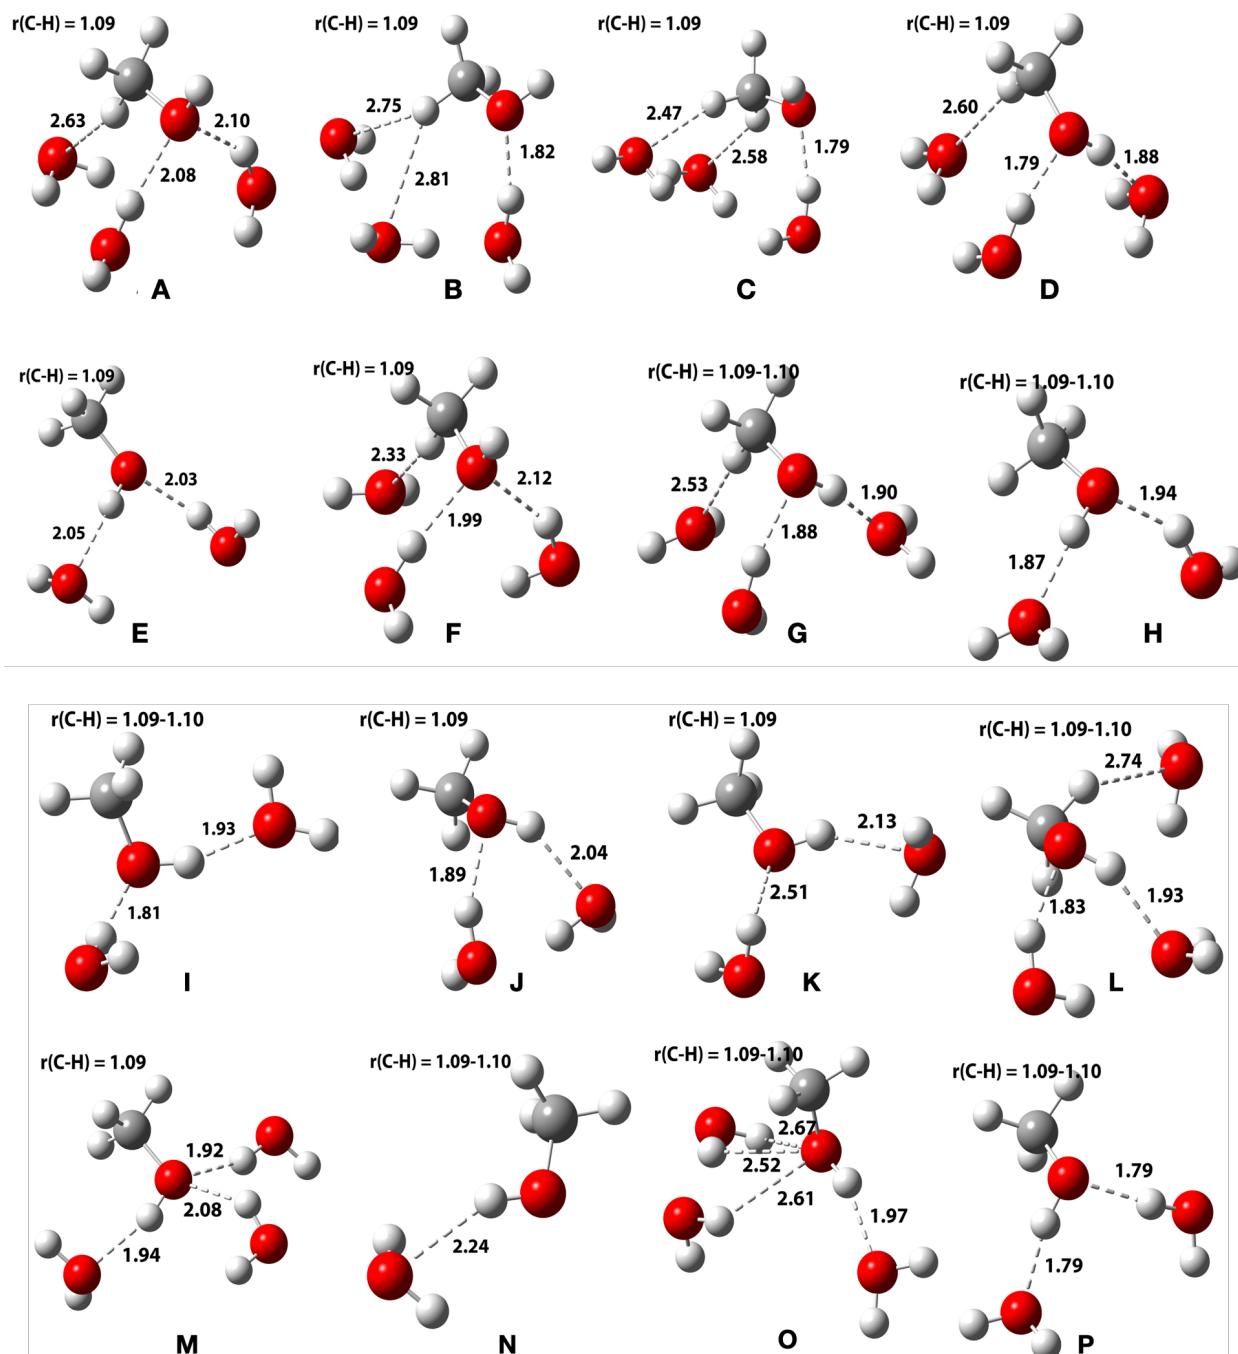

**Figure S2.** Optimized structures of  $\text{CH}_3\text{OH}$  molecule on ice. For simplicity, only the  $\text{CH}_3\text{OH}$  molecule and a few water molecules in the binding site are shown.

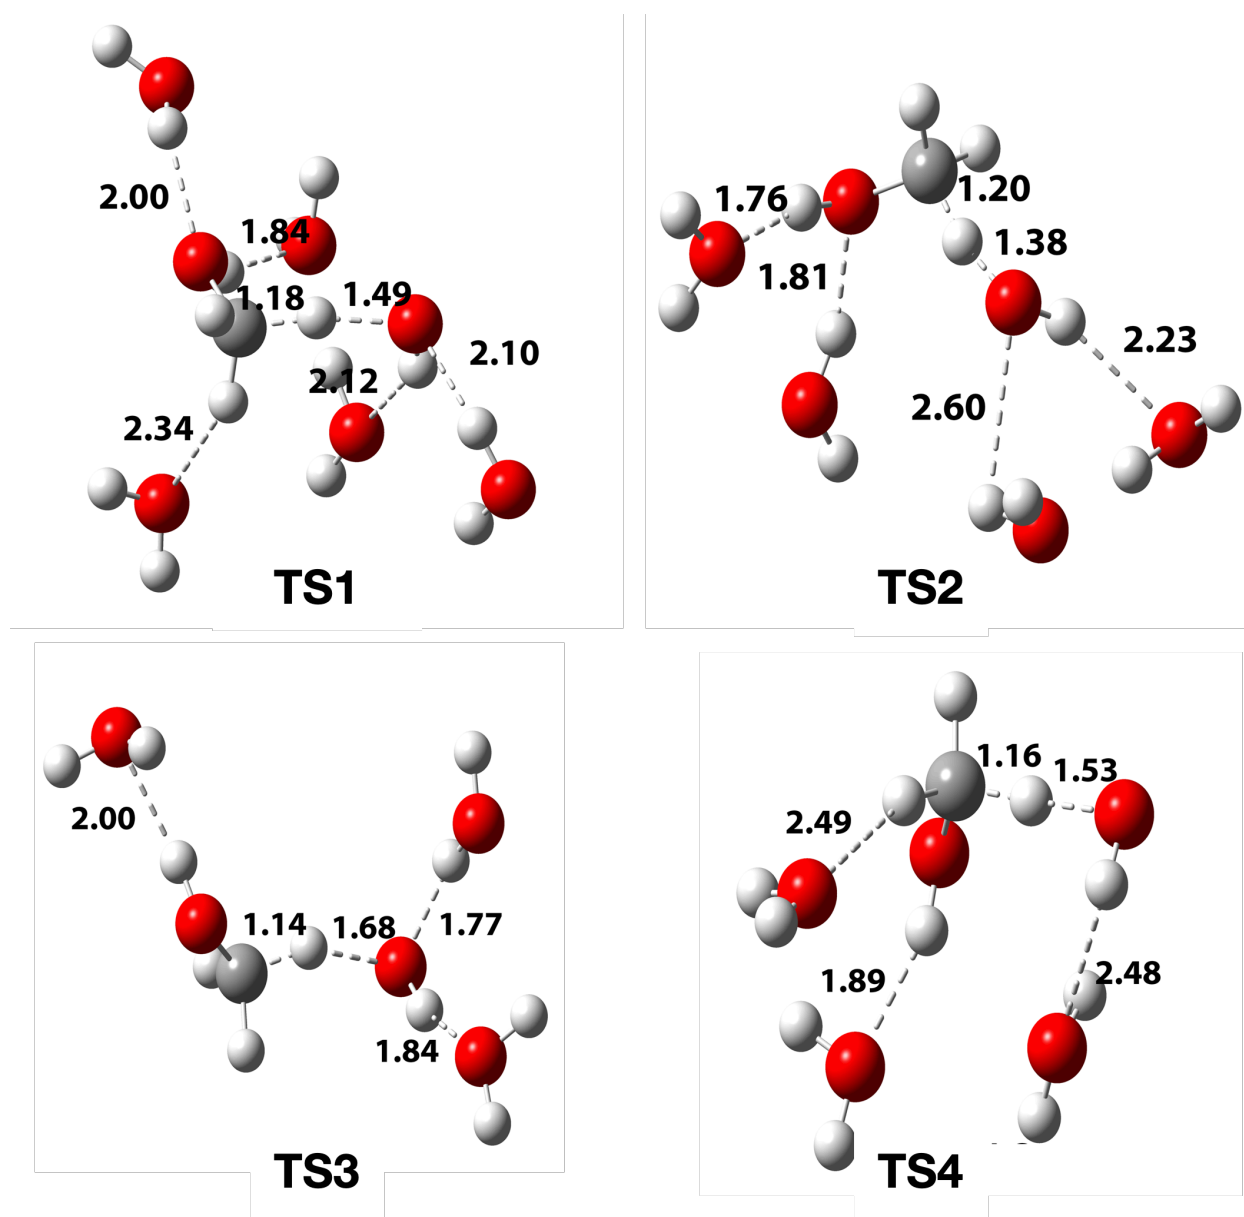

**Figure S3.** Optimized transition state structures of  $\text{CH}_3\text{OH} + \text{OH} \rightarrow \text{CH}_2\text{OH} + \text{H}_2\text{O}$ . For simplicity, only the  $\text{CH}_3\text{OH}\cdots\text{OH}$  unit and a few water molecules in the binding site are shown.

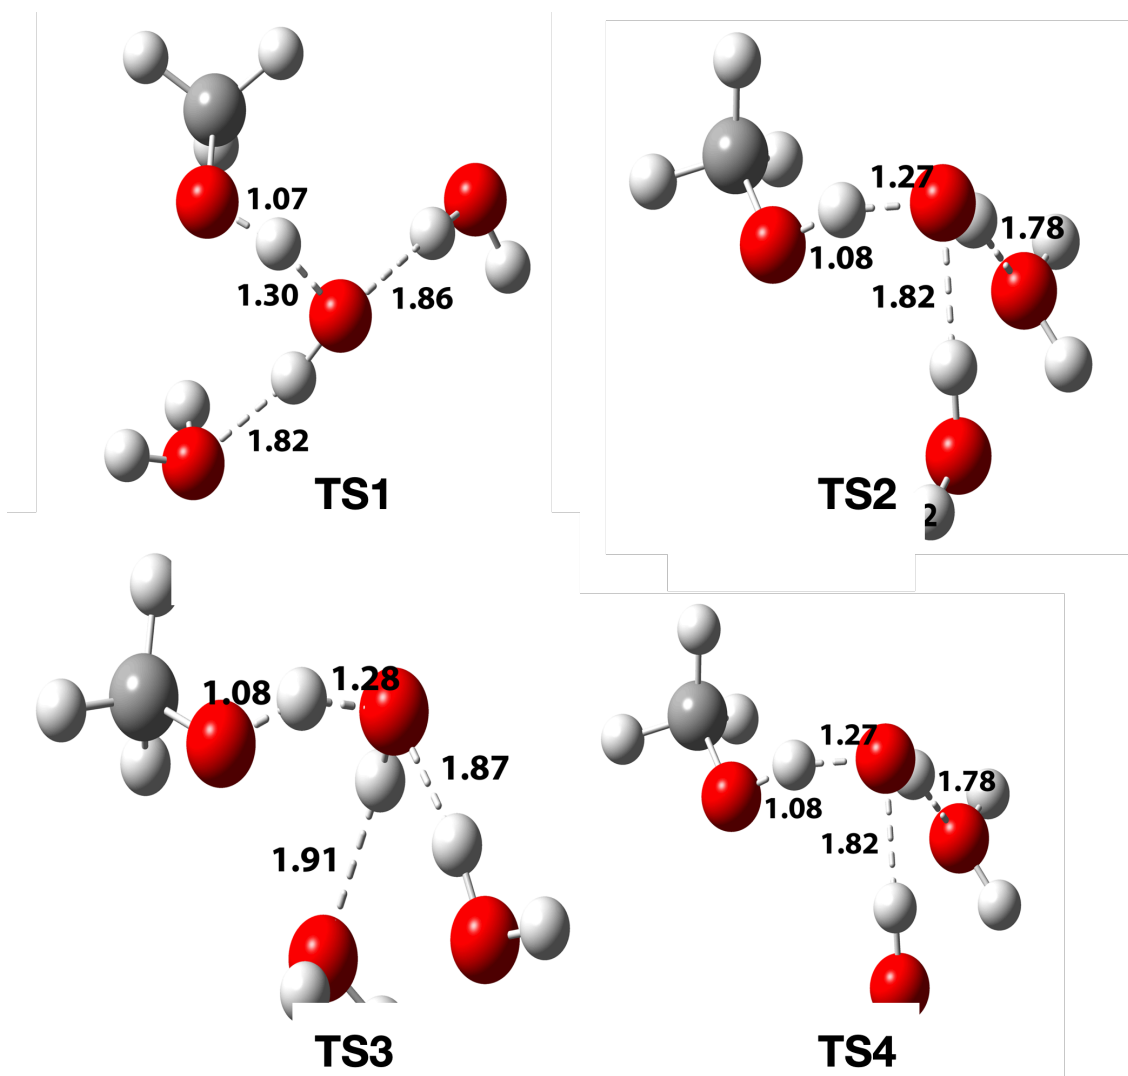

**Figure S4** Optimized transition state structures of  $\text{CH}_3\text{OH} + \text{OH} \rightarrow \text{CH}_3\text{O} + \text{H}_2\text{O}$ . For simplicity, only the  $\text{CH}_3\text{OH} \cdots \text{OH}$  unit and a few water molecules in the binding site are shown.

**Table S3** Computed energies of the optimized structures.

| <b>CH<sub>2</sub>OH-ice complex</b> | <b>Zero-point energy/AU</b> | <b>Potential energy/AU</b> |
|-------------------------------------|-----------------------------|----------------------------|
| A                                   | 1.34154                     | -3786.89542                |
| B                                   | 1.34112                     | -3786.89307                |
| C                                   | 1.34031                     | -3786.88591                |

|                                   |                      |                     |
|-----------------------------------|----------------------|---------------------|
| D                                 | 1.33971              | -3786.87608         |
| E                                 | 1.30047              | -3671.79168         |
| F                                 | 1.23026              | -3480.93792         |
| G                                 | 1.23484              | -3480.97995         |
| H                                 | 1.22950              | -3480.94311         |
| I                                 | 1.35876              | -3862.92004         |
| J                                 | 1.35916              | -3862.92070         |
| K                                 | 1.35872              | -3862.92776         |
| L                                 | 1.35858              | -3862.92798         |
| M                                 | 1.35858              | -3862.92798         |
| N                                 | 1.35745              | -3862.91255         |
| O                                 | 1.35787              | -3862.91845         |
| P                                 | 1.35917              | -3862.92049         |
| CH <sub>3</sub> OH-ice<br>complex | Zero-point energy/AU | Potential energy/AU |
| A                                 | 1.35440              | -3787.54773         |
| B                                 | 1.35347              | -3787.54689         |
| C                                 | 1.35439              | -3787.54705         |
| D                                 | 1.35778              | -3787.55976         |
| E                                 | 1.35324              | -3787.53790         |
| F                                 | 1.24446              | -3481.60389         |
| G                                 | 1.24771              | -3481.64782         |
| H                                 | 1.24559              | -3481.62022         |
| I                                 | 1.37349              | -3863.58592         |
| J                                 | 1.37200              | -3863.57937         |
| K                                 | 1.37357              | -3863.58464         |
| L                                 | 1.37326              | -3863.59248         |
| M                                 | 1.37281              | -3863.59271         |
| N                                 | 1.37164              | -3863.58068         |
| O                                 | 1.37099              | -3863.57425         |
| P                                 | 1.37219              | -3863.58313         |



**Table S4.** Computed energies of LMs and TSs of the reaction paths.

| <b>CH<sub>3</sub>OH + OH →<br/>CH<sub>2</sub>OH + H<sub>2</sub>O</b> | <b>Zero-point energy/AU</b> | <b>Potential energy/AU</b> |
|----------------------------------------------------------------------|-----------------------------|----------------------------|
| R1                                                                   | 0.91897                     | -4778.64615                |
| TS1                                                                  | 0.91755                     | -4778.64324                |
| P1                                                                   | 0.92118                     | -4778.68839                |
|                                                                      |                             |                            |
| R2                                                                   | 0.92231                     | -4778.64948155             |
| TS2                                                                  | 0.92041                     | -4778.64359539             |
| P2                                                                   | 0.92285                     | -4778.68294891             |
|                                                                      |                             |                            |
| R2                                                                   | 0.92194                     | -4778.64948                |
| TS2                                                                  | 0.91743                     | -4778.64359                |
| P2                                                                   | 0.92216                     | -4778.68294                |
|                                                                      |                             |                            |
| R4                                                                   | 0.92048                     | -4778.65103                |
| TS4                                                                  | 0.91706                     | -4778.64319                |
| P4                                                                   | 0.92048                     | -4778.68478                |
|                                                                      |                             |                            |
| <b>CH<sub>3</sub>OH + OH →<br/>CH<sub>3</sub>O + H<sub>2</sub>O</b>  |                             |                            |
| R1'                                                                  | 0.92114                     | -4778.64830                |
| TS1'                                                                 | 0.91582                     | -4778.64181                |
| P1'                                                                  | 0.91967                     | -4778.67809                |

|      |         |             |
|------|---------|-------------|
|      |         |             |
| R2'  | 0.92143 | -4778.64601 |
| TS2' | 0.91667 | -4778.63734 |
| P2'  | 0.92069 | -4778.67300 |
|      |         |             |
| R3'  | 0.92009 | -4778.65464 |
| TS3' | 0.91471 | -4778.63716 |
| P3'  | 0.91918 | -4778.67008 |
|      |         |             |
| R4'  | 0.92111 | -4778.65623 |
| TS4' | 0.92040 | -4778.63944 |
| P4'  | 0.92020 | -4778.67481 |
